# Supplementary material for: Proteogenomic characterization of MiT family translocation renal cell carcinoma
Source: PubMed Central journal article supplement (PMC9722939; doi:10.1038/s41467-022-34460-w), 2022-12-05
Supplement: 41467_2022_34460_MOESM3_ESM.pdf [file 41467_2022_34460_MOESM3_ESM.pdf]

### **Description of Additional Supplementary Files**

File Name: Supplementary Data 1

Description: Clinical characteristics of 86 Chinese tRCC patients and data availability

File Name: Supplementary Data 2

Description: Genetic alterations in tRCC

File Name: Supplementary Data 3

Description: Transcriptome, proteome and phosphoproteome expression matrix of tRCC tumor and NAT samples

File Name: Supplementary Data 4

Description: Differential analysis between tRCC tumor and NAT

File Name: Supplementary Data 5

Description: Clinical and molecular features among different fusion types of tRCC

File Name: Supplementary Data 6

Description: Proteomic subtypes and molecular features

File Name: Supplementary Data 7

Description: Immune subtypes and associated clinical and molecular features
